# Supplementary material for: Prognostic significance of ITGA2 expression in cervical cancer
Source: Research Square preprint supplement (doi:10.21203/rs.3.rs-6181852/v1), 2025-03-14
Supplement: Supplementary file 1 [file 1e7041a1c9a19d89b448ce92.docx]

Table S1. Cancer Type Abbreviations and Full Names

| Abbr | name |
| --- | --- |
| ACC | Adrenocortical Carcinoma |
| BLCA | Bladder Urothelial Carcinoma |
| BRCA | Breast Invasive Carcinoma |
| CESC | Cervical Squamous Cell Carcinoma and Endocervical Adenocarcinoma |
| CHOL | Cholangiocarcinoma |
| COAD | Colon Adenocarcinoma |
| DLBC | Lymphoid Neoplasm Diffuse Large B-cell Lymphoma |
| ESCA | Esophageal Carcinoma |
| GBM | Glioblastoma Multiforme |
| HNSC | Head and Neck Squamous Cell Carcinoma |
| KICH | Kidney Chromophobe |
| KIRC | Kidney Renal Clear Cell Carcinoma |
| KIRP | Kidney Renal Papillary Cell Carcinoma |
| LAML | Acute Myeloid Leukemia |
| LGG | Brain Lower Grade Glioma |
| LIHC | Liver Hepatocellular Carcinoma |
| LUAD | Lung Adenocarcinoma |
| LUSC | Lung Squamous Cell Carcinoma |
| OV | Ovarian Serous Cystadenocarcinoma |
| PAAD | Pancreatic Adenocarcinoma |
| PCPG | Pheochromocytoma and Paraganglioma |
| PRAD | Prostate Adenocarcinoma |
| READ  SARC  SKCM  STAD  TGCT  THCA  THYM  UCEC  UCS | Rectum AdenocarcinSarcomaoma  Sarcoma  Skin Cutaneous Melanoma  Stomach Adenocarcinoma  Testicular Germ Cell Tumors  Thyroid Carcinoma  Thymoma  Uterine Corpus Endometrial Carcinoma  Uterine Carcinosarcoma |
